# Supplementary material for: The re-identification risk of Canadians from longitudinal demographics
Source: Springer Nature journal article supplement (doi:10.1186/1472-6947-11-46), 2011-06-22
Supplement: 12911_2010_426_MOESM4_ESM.pdf [file 12911_2010_426_MOESM4_ESM.pdf]

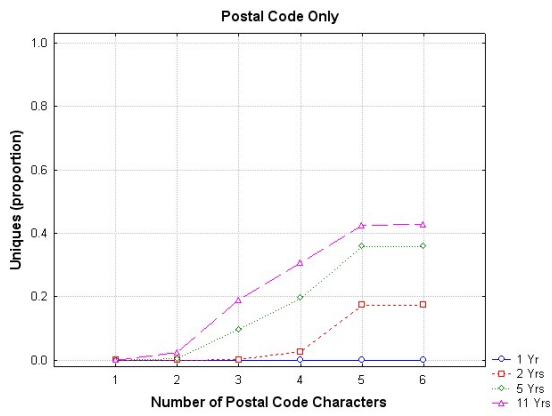

**(a): postal code**

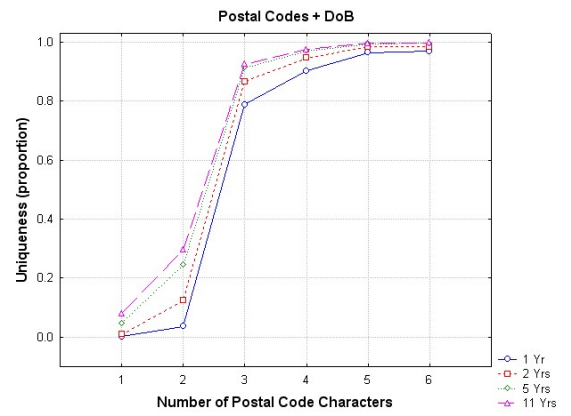

**(b): postal codes + DoB**

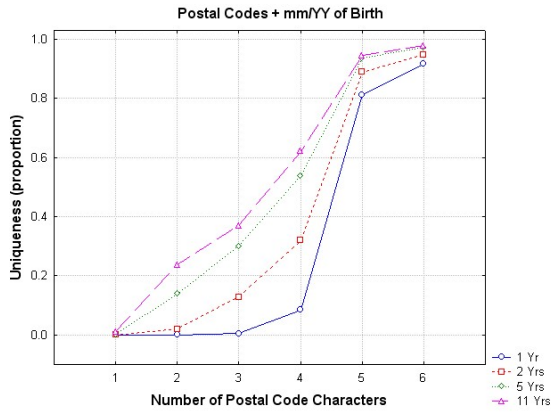

**(c): postal codes + mm/yy of birth**

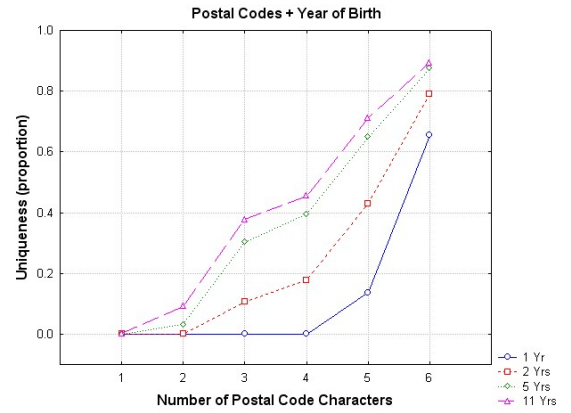

**(d): postal codes + year of birth**

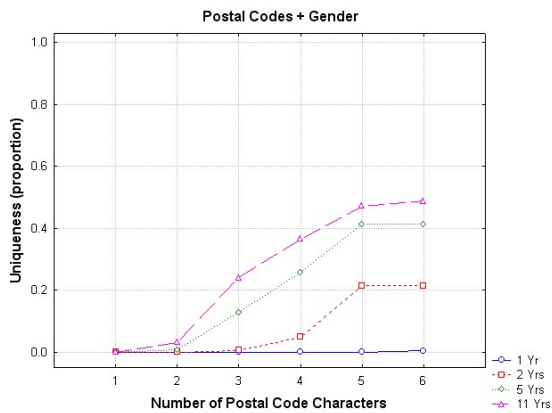

**(e): postal codes + gender**

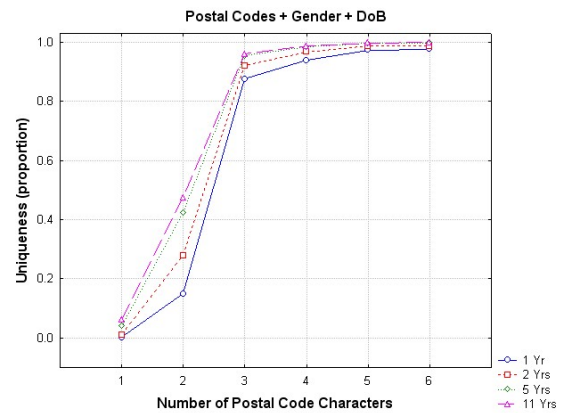

**(f): postal codes + gender + DoB**

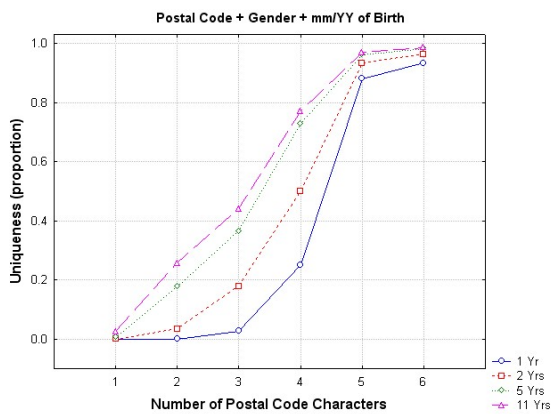

**(g): postal codes + gender + mm/yy of birth**

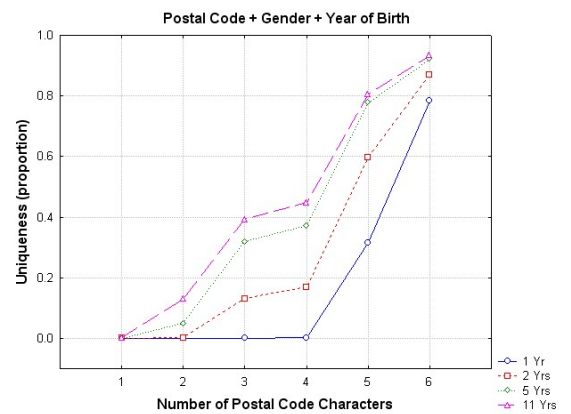

**(h): postal codes + gender + year of birth**
